# Supplementary material for: Implementing Cognitive Remediation Programs in France: The “Secret Sauce”
Source: Atypon-hosted journal article supplement (doi:10.1176/appi.ps.201600033), 2016-03-15
Supplement: appi.ps.201600033.ds001.pdf [file appi.ps.201600033.ds001.pdf]

**Table: Elements of CR programs in France for adults**

|                  |                                                                        |                                                                             |                                                                                                             |                                                                 |                                              |
|------------------|------------------------------------------------------------------------|-----------------------------------------------------------------------------|-------------------------------------------------------------------------------------------------------------|-----------------------------------------------------------------|----------------------------------------------|
| Neurocognition   | Cognitive remediation therapy CRT for frontal executive impairment (1) | Cognitive remediation for schizophrenia for attention and memory, RECOS (3) | Neurocognitive educational program for cognitive remediation – exercises+group behavior sessions (NEAR) (5) |                                                                 |                                              |
|                  | <i>Individual</i>                                                      | <i>individual</i>                                                           | <i>Group</i>                                                                                                |                                                                 |                                              |
| Social Cognition | Integrated Psychological Therapy (IPT) (2)                             | Remediation involving theory of mind TOM-REMED (4)                          | Social Cognition Integrated Therapy - validation underway in the French language- SCIT (6)                  | Cognitive remediation of complex social interactions (RC2S) (7) | Gaia Remediation of facial emotions GAIA (8) |
|                  | <i>Group</i>                                                           | <i>Group</i>                                                                | <i>Group</i>                                                                                                | <i>Individual</i>                                               | <i>Individual</i>                            |

The CR programs in use in France for adults in French or translated from English are: IPT; CRT; RECOS; NEAR and for social cognition domains SCIT (validation underway in French); RC2S ; GAIA; TOM-REMED

## References

- (1) Wykes, T., Reeder, C. Cognitive Remediation Therapy for Schizophrenia: Theory and Practice. Routledge, London 2005
- (2) Brenner HD, Hodel B, Roder V, et al. Treatment of cognitive dysfunctions and behavioral deficits in schizophrenia. Schizophr Bull 1992; 18: 21-6
- (3) Franck N, Duboc C, Sundby C, et al: Specific vs general cognitive remediation for executive functioning in schizophrenia: a multicenter randomized trial. Schizophrenia Research 147:68–74, 2013
- (4) Kayser N, Sarfati Y, Besche C, et al. Elaboration of a rehabilitation method based on a pathogenetic hypothesis of "theory of mind" impairment in schizophrenia. Neuropsychol Rehabil 2006; 16: 83-95
- (5) Medalia A, Revheim N, Herlands T: Cognitive remediation for psychological disorders. Therapist Guide, Oxford University Press 2009
- (6) Penn, D. L., Roberts, D. L., Combs, D., and Sterne, A. (2007). The development of the social cognition and interaction training program for schizophrenia spectrum disorders. Psychiatr. Serv. 58, 449–451. doi:10.1176/appi.ps.58.4.449
- (7) Peyroux E, Franck N. RC2S: a cognitive remediation program to improve social cognition in schizophrenia and related disorders. Front Hum Neurosci. 2014 Jun 13;8:400. doi: 10.3389/fnhum.2014.00400. eCollection 2014
- (8) Gaudelus B, Virgile J, Peyroux E, et al: Measuring impairment of facial affects recognition in schizophrenia. Preliminary study of the facial emotions recognition task (TREF) [in French]. L'Encéphale 41:251–259, 2015
